# Supplementary material for: Plant-mediated synthesis of Au–Pd alloy nanoparticles supported on MnO2nanostructures and their application toward oxidation of 5-(hydroxymethyl)furfural
Source: Royal Society of Chemistry journal article supplement (doi:10.1039/c5ra13157j), 2015-01-01
Supplement: c5ra13157j1.pdf [file c5ra13157j1.pdf]

Supplementary Information

Respective liquid chromatograms:

1. Effect of Au-Pd Ratio Based on Different Support

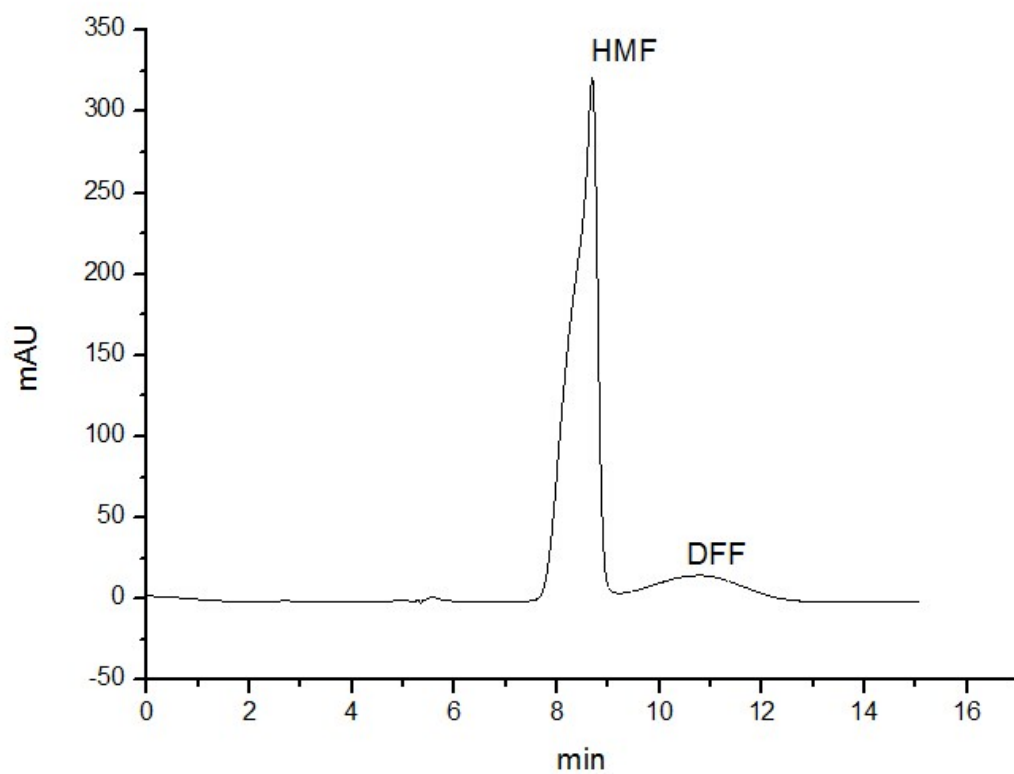

Figure 1. Bare Au supported on microsphere  $\text{MnO}_2$ . Conversion: 11%, selectivity: 95%.

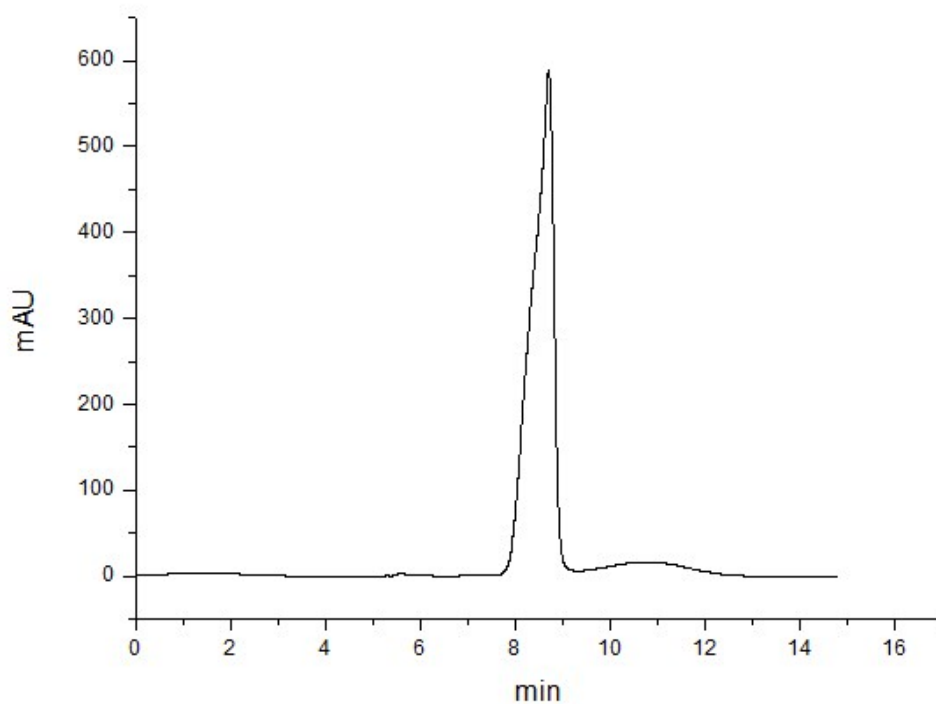

Figure 2. Bare Au supported on cubic  $\text{MnO}_2$ . Conversion: 6%, selectivity: 95%.

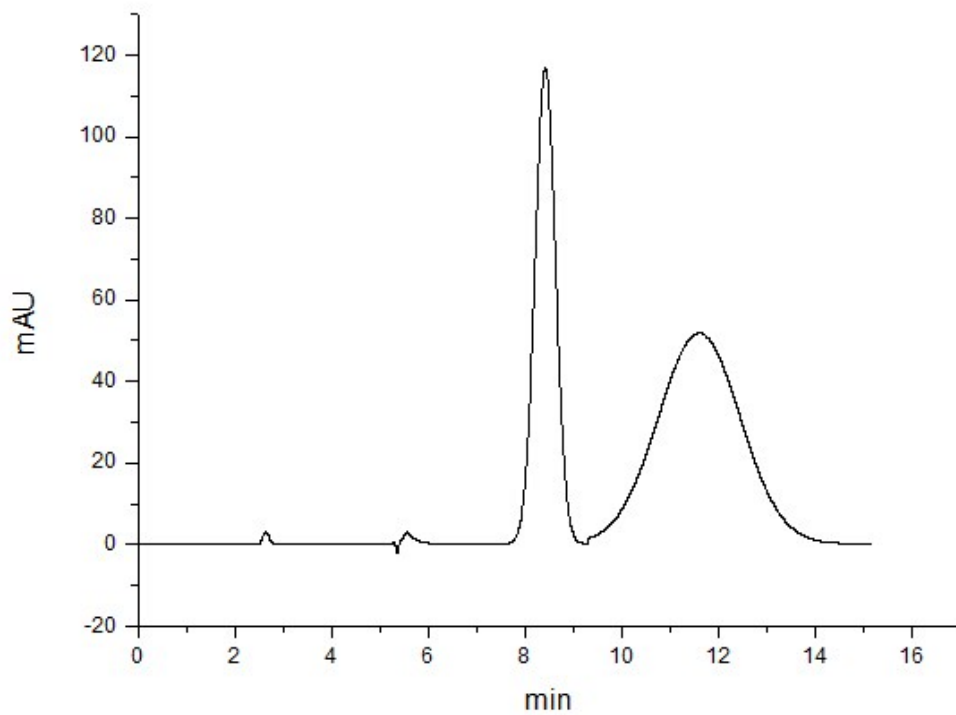

Figure 3. Au: Pd = 7:1, supported on microsphere MnO<sub>2</sub>. Conversion: 63%, selectivity: 97%.

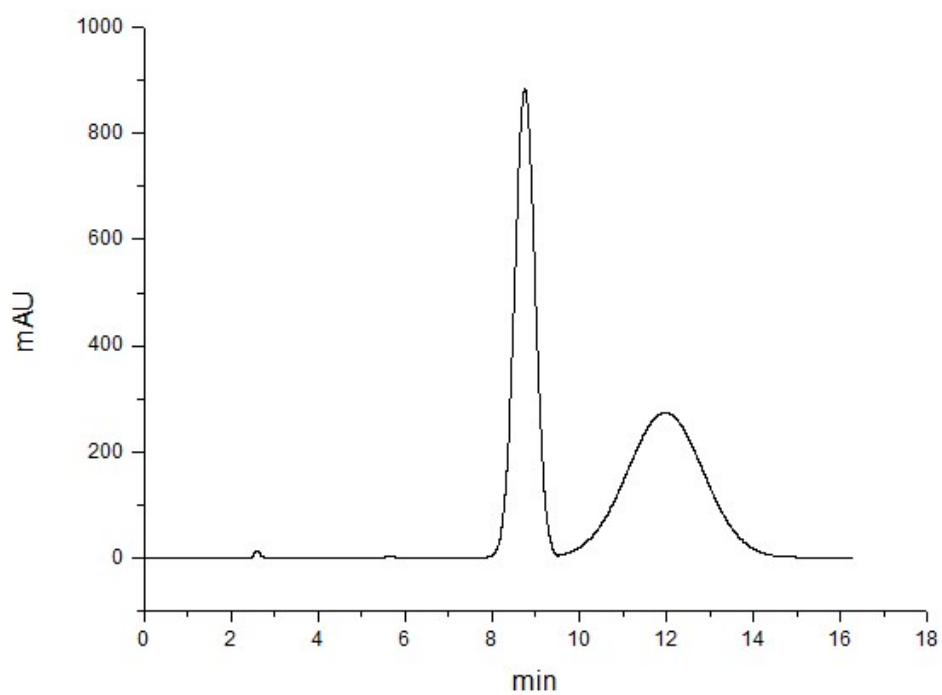

Figure 4. Au: Pd = 7:1, supported on cubic MnO<sub>2</sub>. Conversion: 53%, selectivity: 97%.

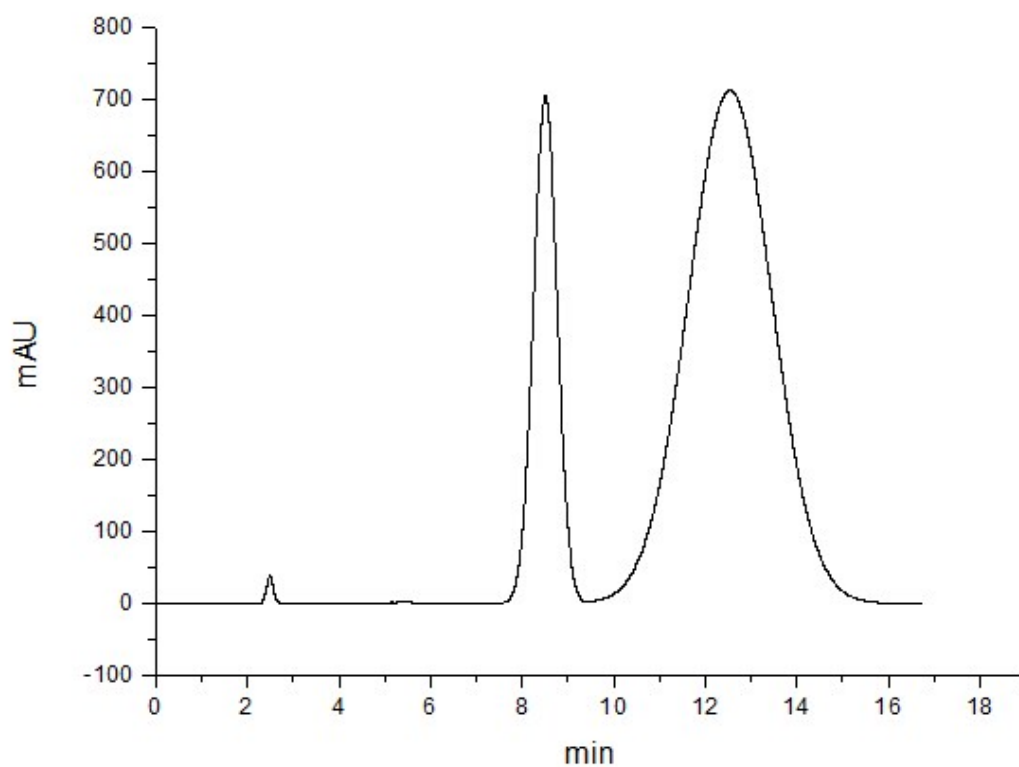

Figure 5. Au: Pd = 2:1, supported on microsphere  $\text{MnO}_2$ . Conversion: 76%, selectivity: 98%.

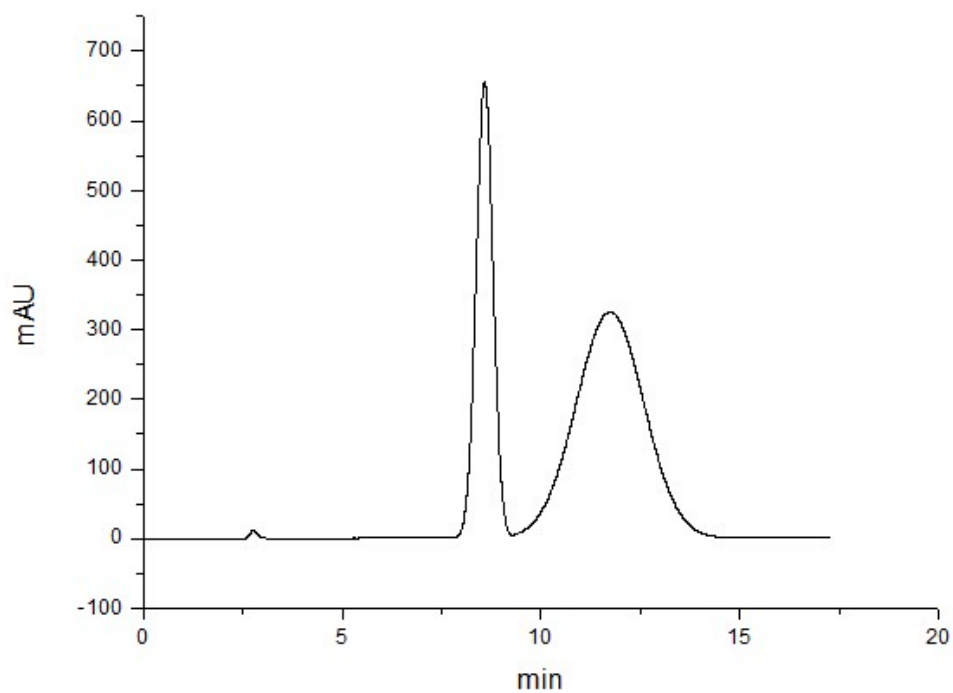

Figure 6. Au: Pd = 2:1, supported on cubic  $\text{MnO}_2$ . Conversion: 65%, selectivity: 98%.

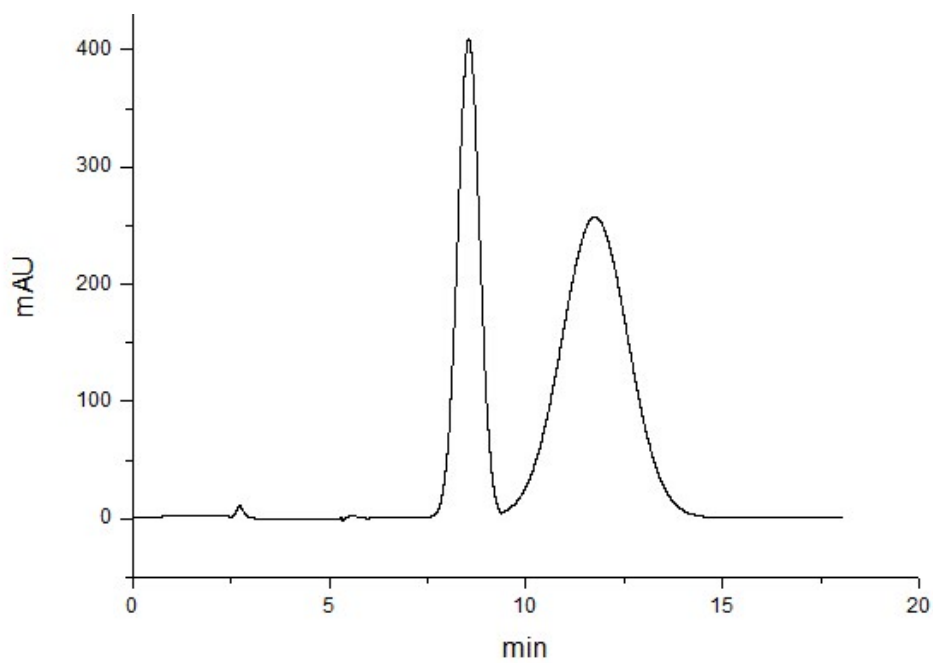

Figure 7. Au: Pd = 1:1, supported on microsphere MnO<sub>2</sub>. Conversion: 65%, selectivity: 97%.

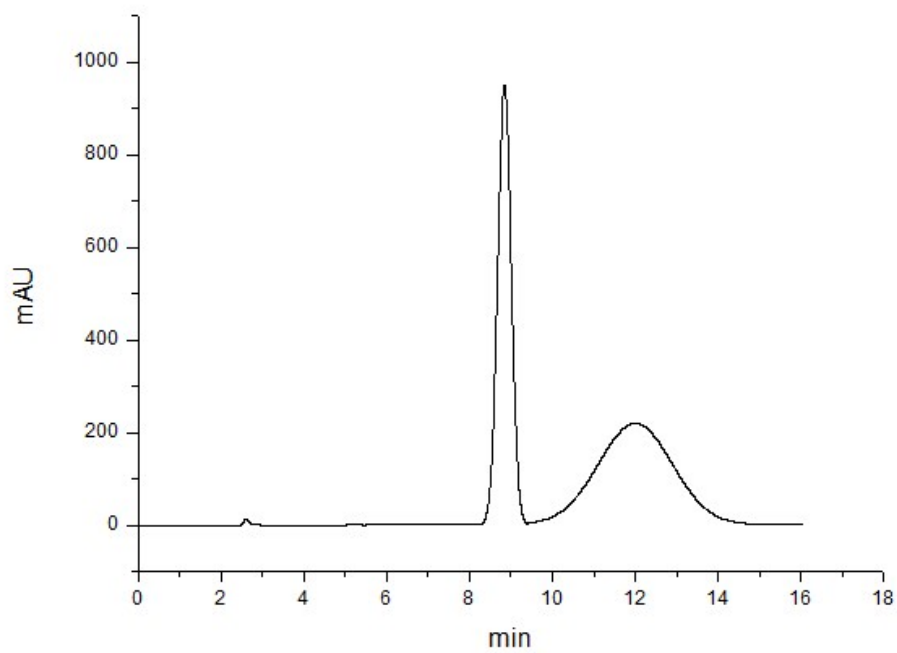

Figure 8. Au: Pd = 1:1, supported on cubic MnO<sub>2</sub>. Conversion: 54%, selectivity: 98%.

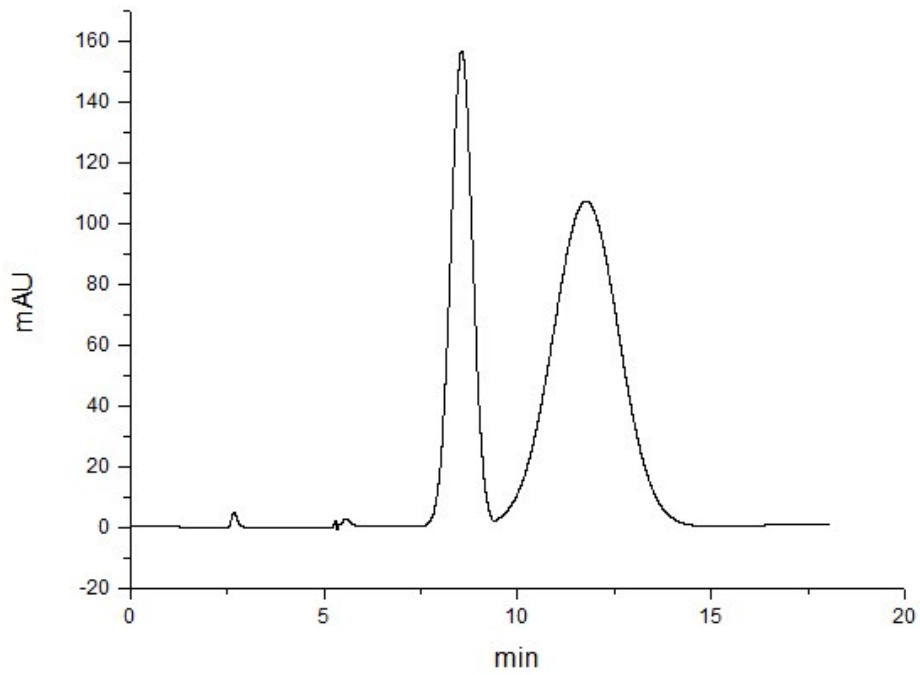

Figure 9. Au: Pd = 1:2, supported on microsphere MnO<sub>2</sub>. Conversion: 67%, selectivity: 98%.

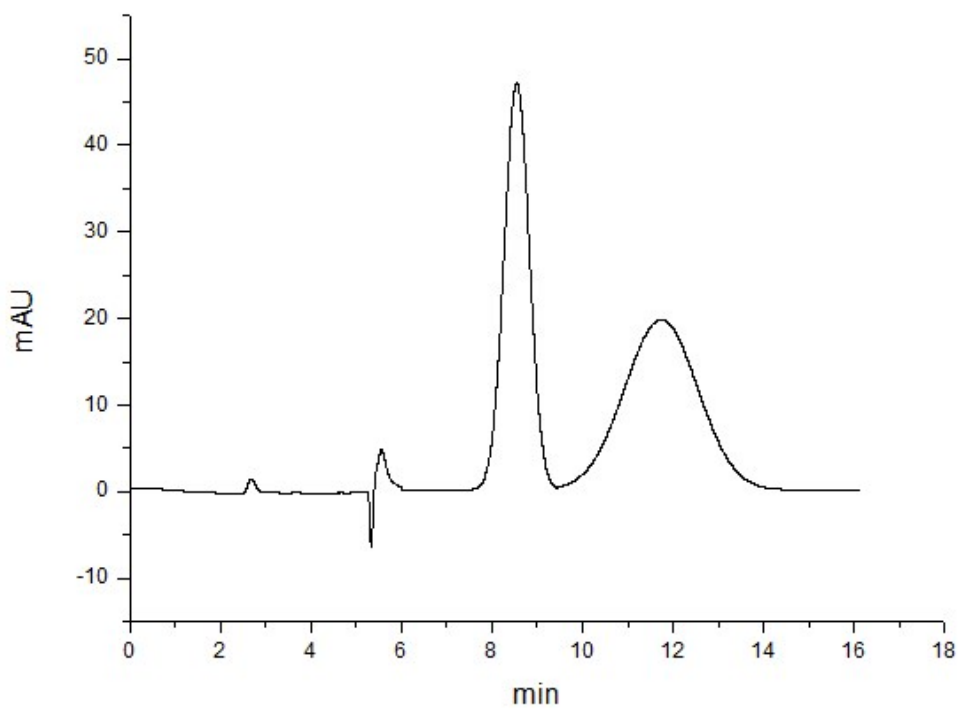

Figure 10. Au: Pd = 1:2, supported on cubic MnO<sub>2</sub>. Conversion: 64%, selectivity: 97%.

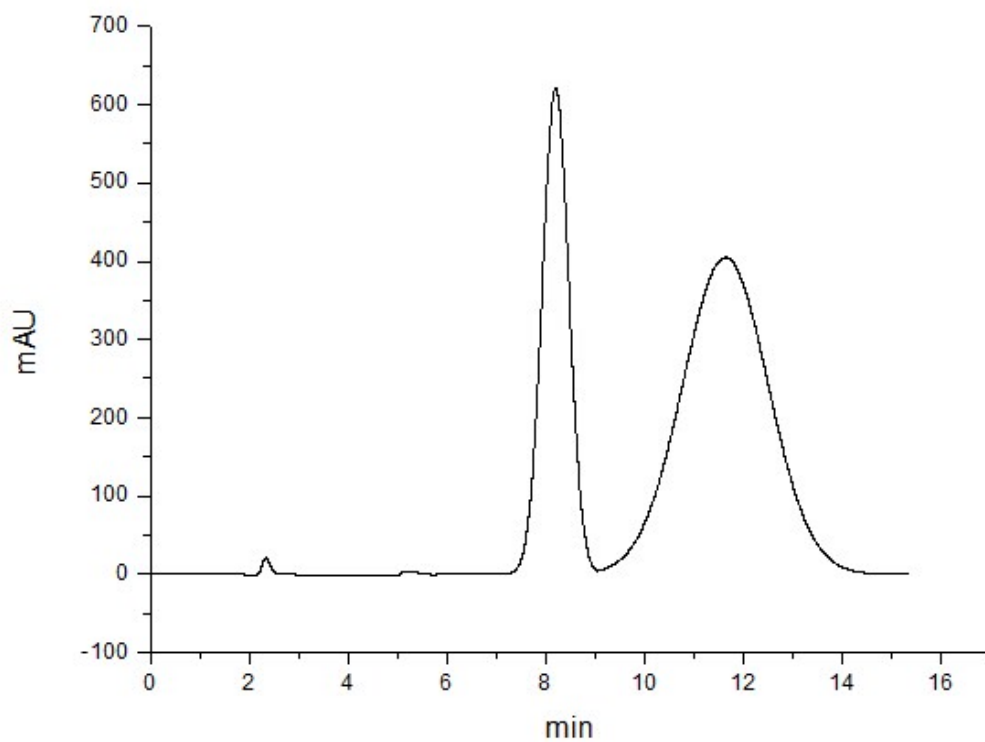

Figure 11. Au: Pd = 1:7, supported on microsphere  $\text{MnO}_2$ . Conversion: 64%, selectivity: 98%.

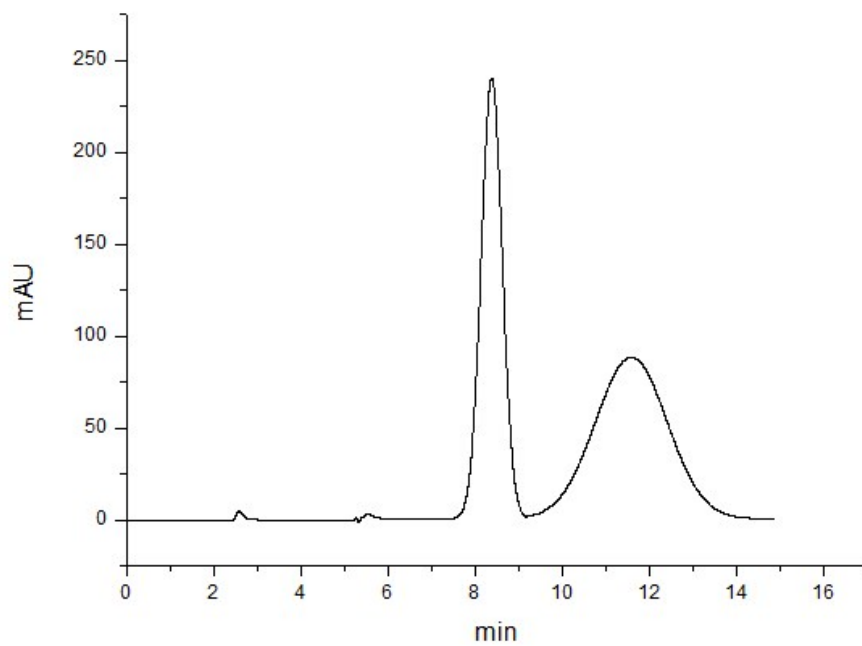

Figure 12. Au: Pd = 1:7, supported on cubic  $\text{MnO}_2$ . Conversion: 52%, selectivity: 98%.

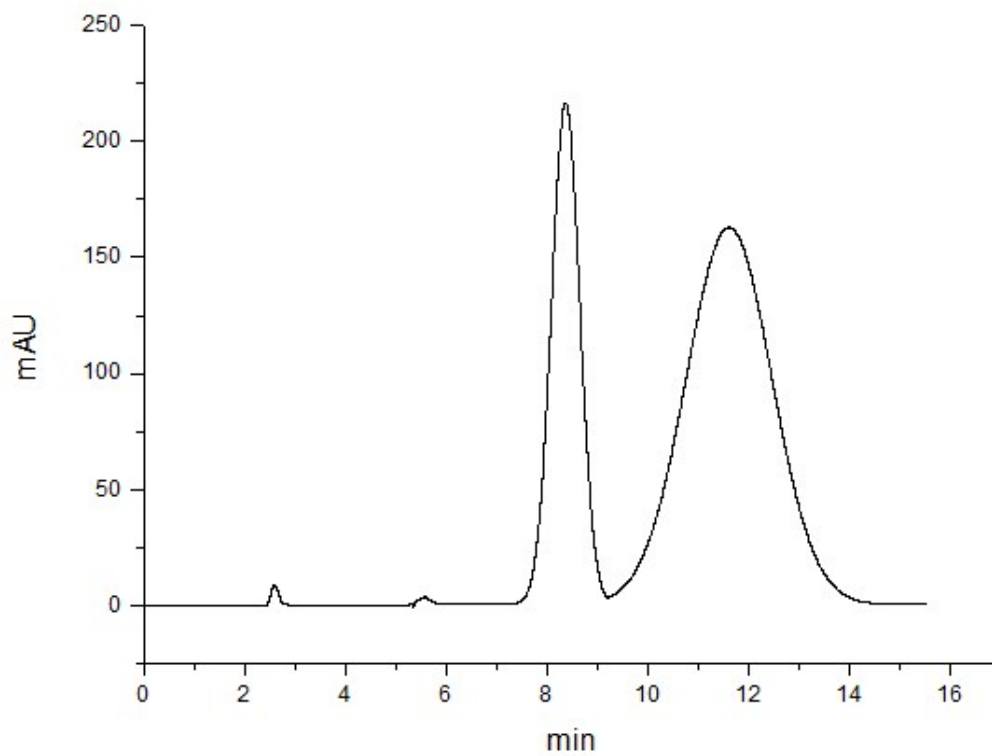

Figure 13. Bare Pd, supported on microsphere  $\text{MnO}_2$ . Conversion: 70%, selectivity: 97%.

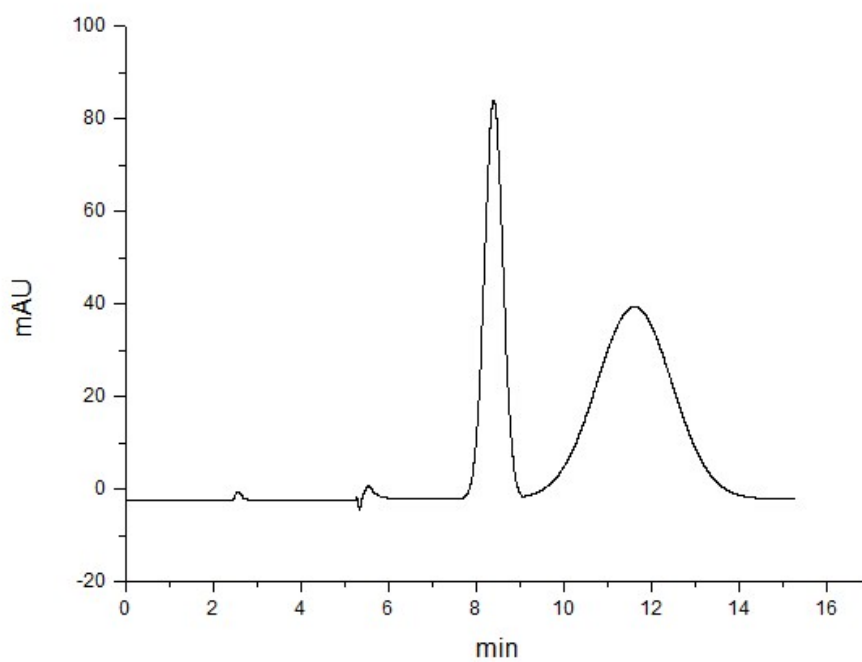

Figure 14. Bare Pd, supported on cubic  $\text{MnO}_2$ . Conversion: 63%, selectivity: 98%.

## 2. Effect of bio-reduction temperature

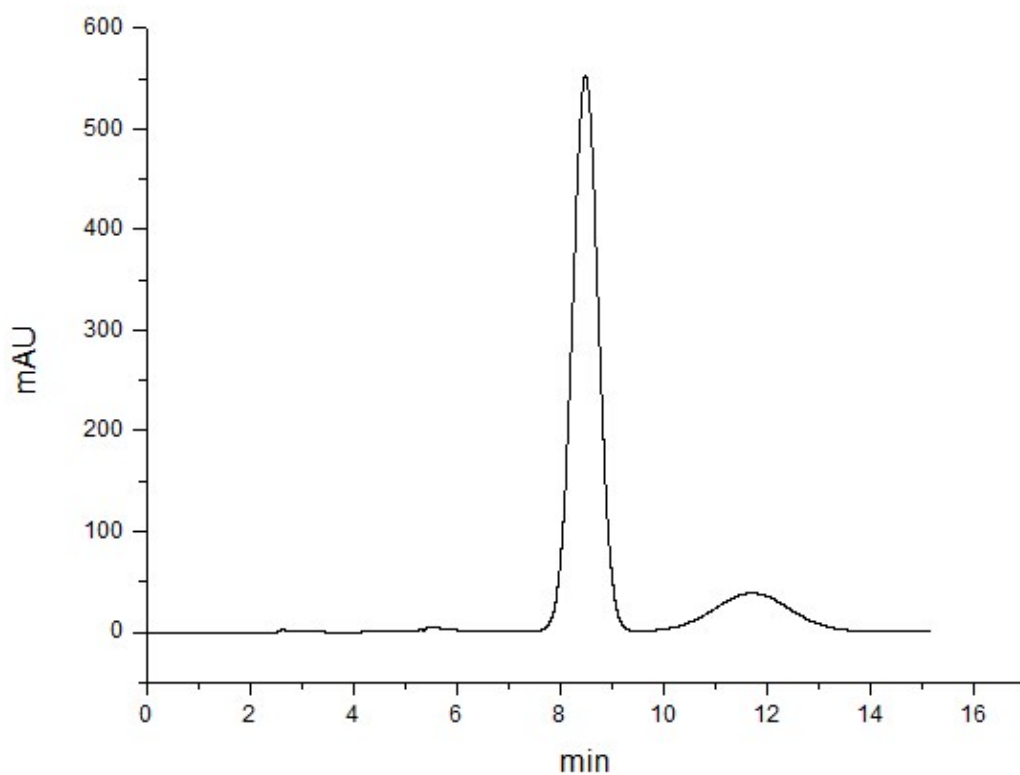

Figure 15. Bio-reduction temperature: 40°C, reaction temperature: 90 °C, Au: Pd=2:1. Conversion: 14%, selectivity: 97%.

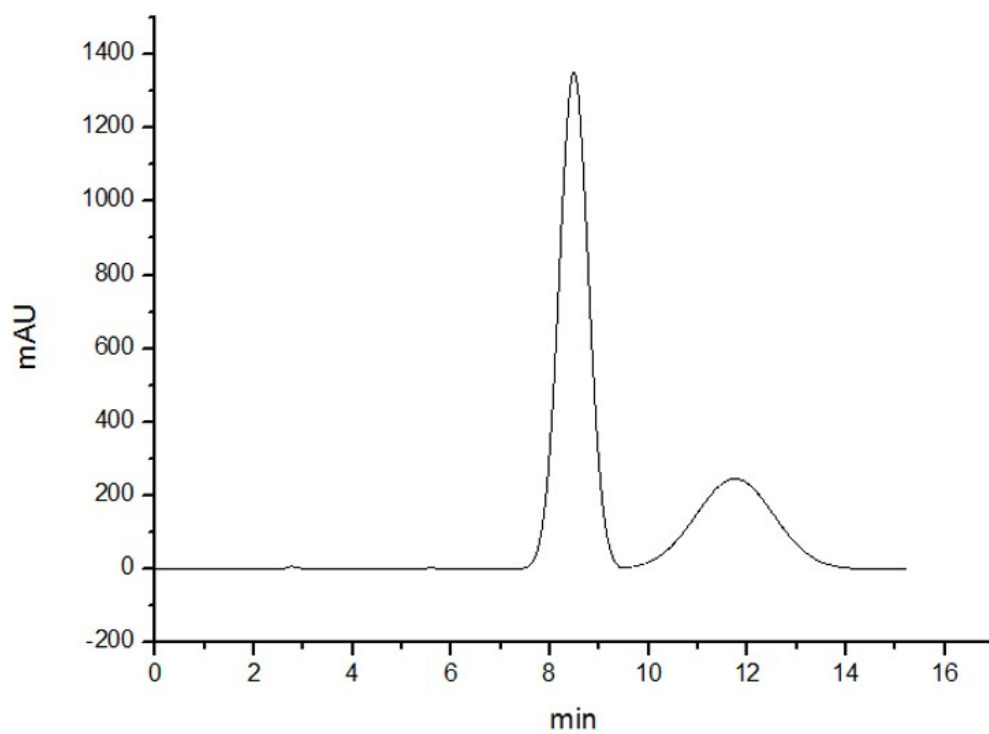

Figure 16. Bio-reduction temperature: 50°C, reaction temperature: 90 °C, Au: Pd=2:1. Conversion: 22%, selectivity: 99%.



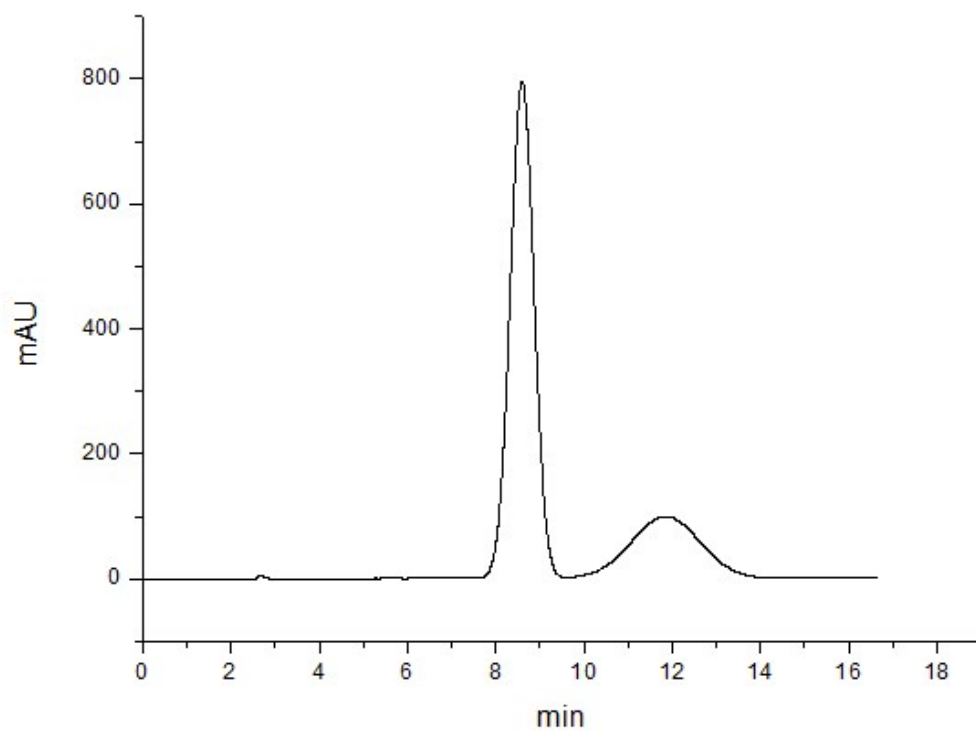

Figure 17. Bio-reduction temperature: 60°C, reaction temperature: 90 °C, Au: Pd=2:1. Conversion: 28%, selectivity: 99%.

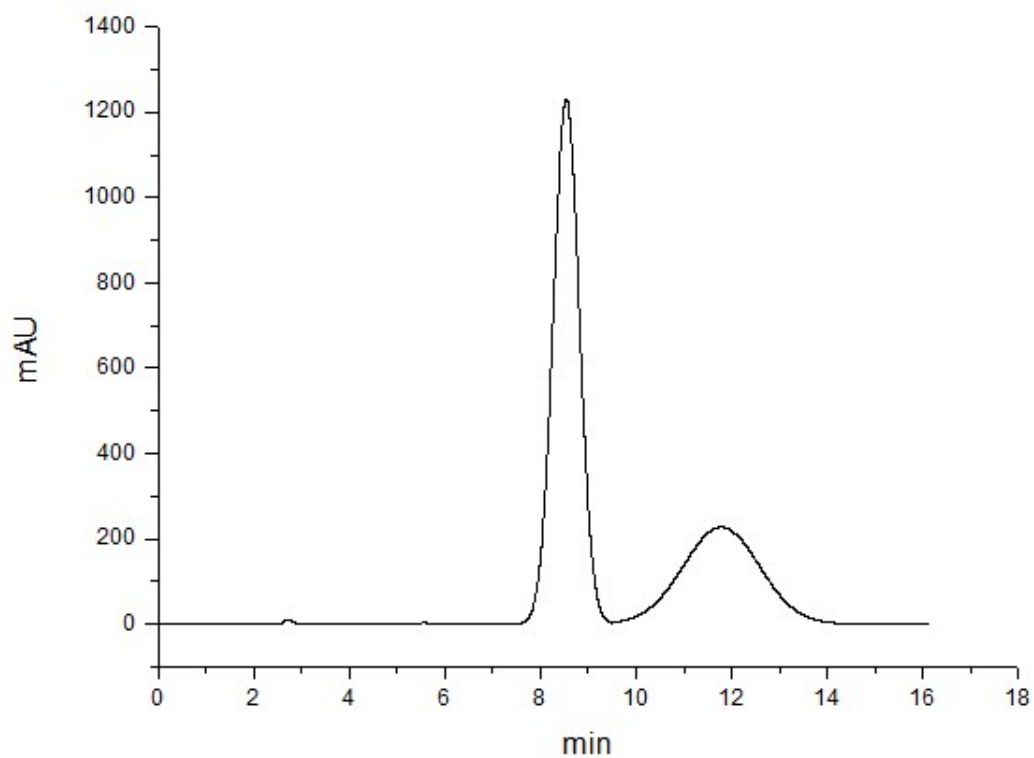

Figure 18. Bio-reduction temperature: 70°C, reaction temperature: 90 °C, Au: Pd=2:1. Conversion: 36%, selectivity: 98%.

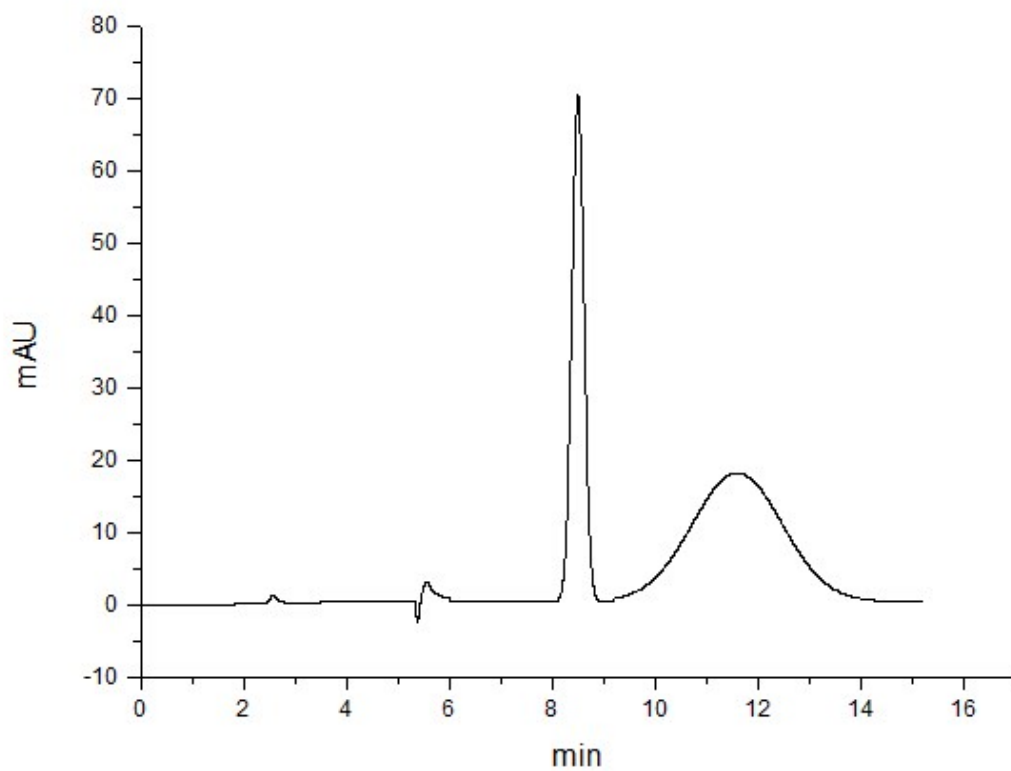

Figure 19. Bio-reduction temperature: 80°C, reaction temperature: 90 °C, Au: Pd=2:1. Conversion: 64%, selectivity: 98%.

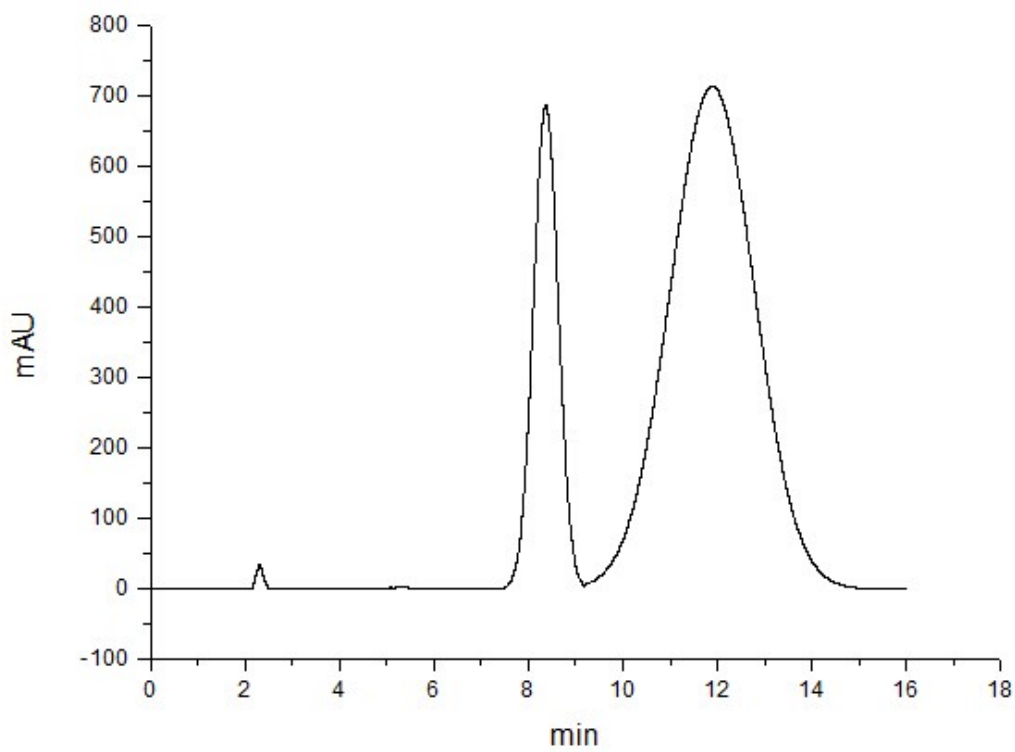

Figure 20. Bio-reduction temperature: 90°C, reaction temperature: 90 °C, Au: Pd=2:1. Conversion: 76%, selectivity: 98%.

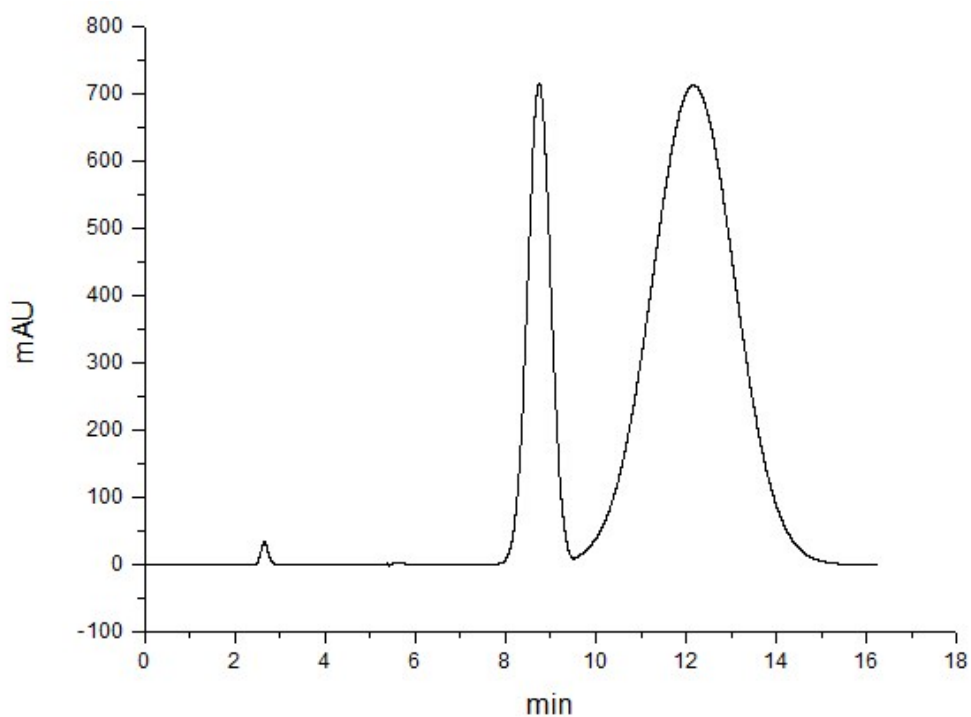

Figure 21. Bio-reduction temperature: 100°C, reaction temperature: 90°C, Au: Pd=2:1. Conversion: 76%, selectivity: 98%.

### 3. Effect of reaction temperature

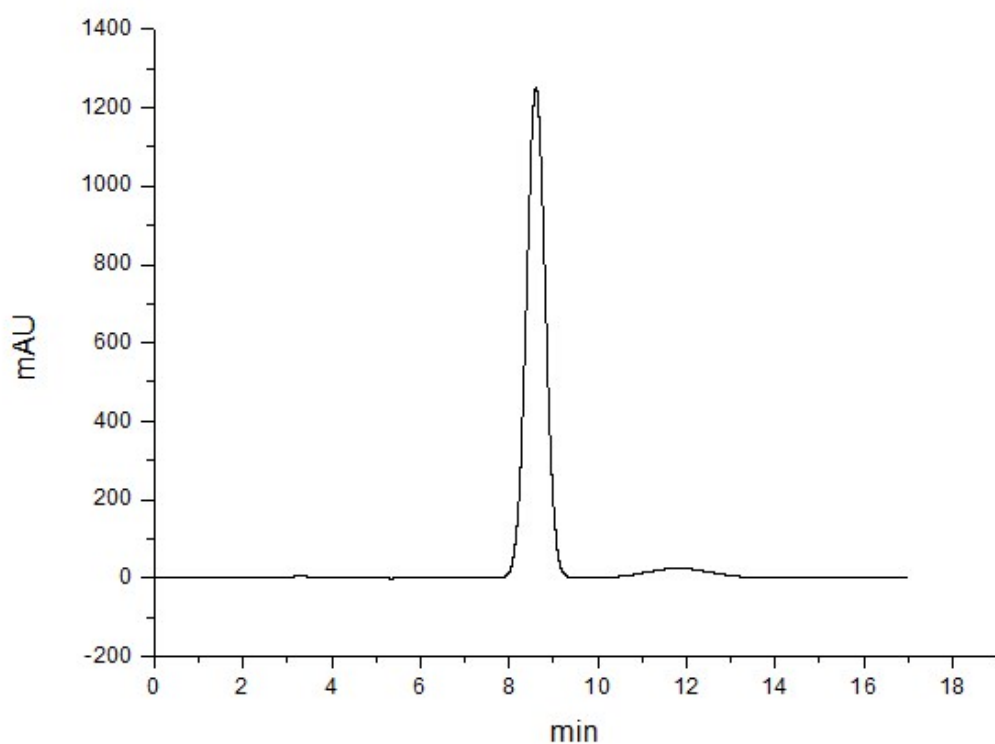

Figure 22. Reaction temperature: 40°C, Bio-reduction temperature: 90°C, Au: Pd=2:1. Conversion: 4%, selectivity: 99%.

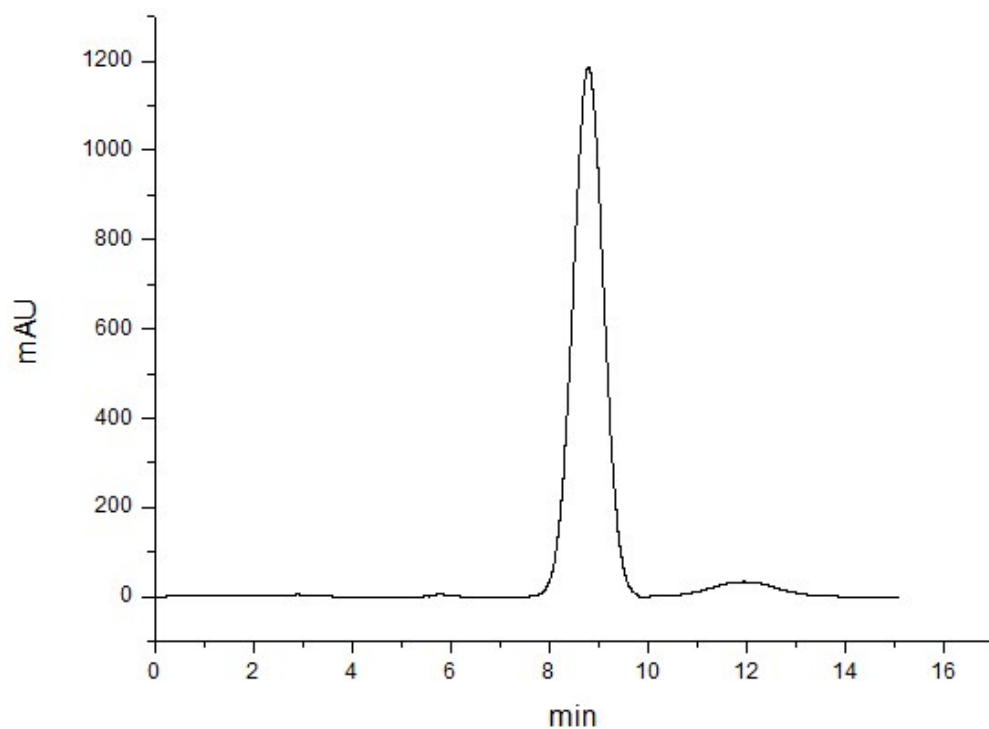

Figure 23. Reaction temperature: 50°C, Bio-reduction temperature: 90 °C, Au: Pd=2:1. Conversion: 4%, selectivity: 99%.

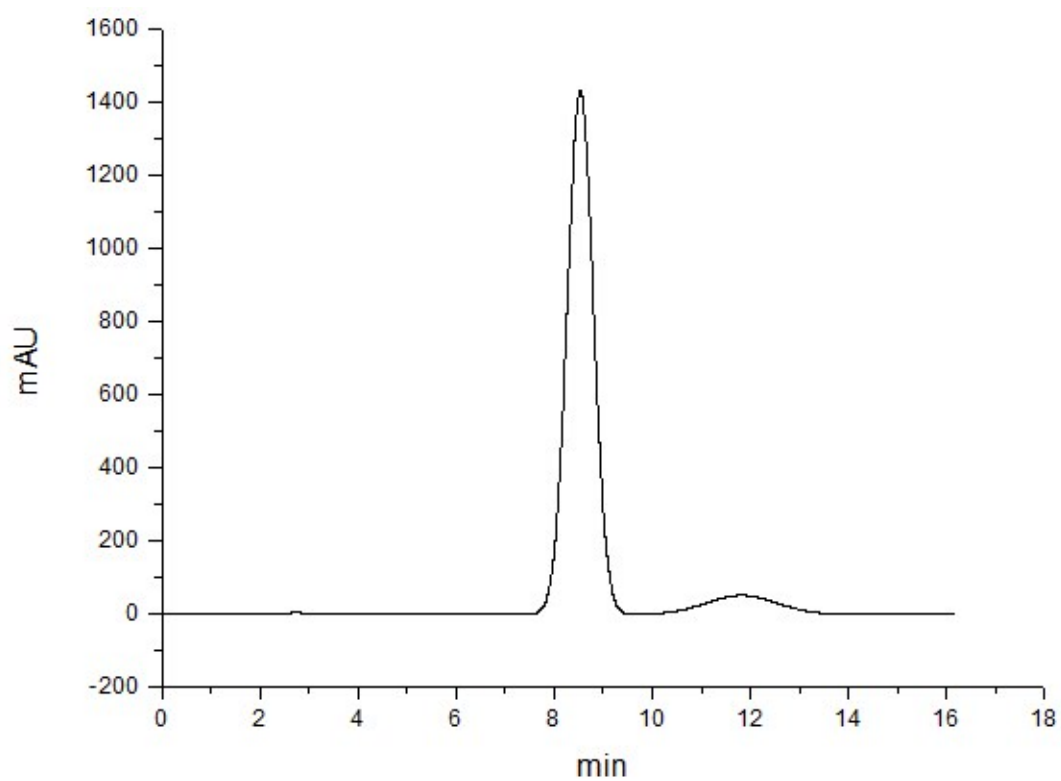

Figure 24. Reaction temperature: 60°C, Bio-reduction temperature: 90 °C, Au: Pd=2:1. Conversion: 6%, selectivity: 99%.

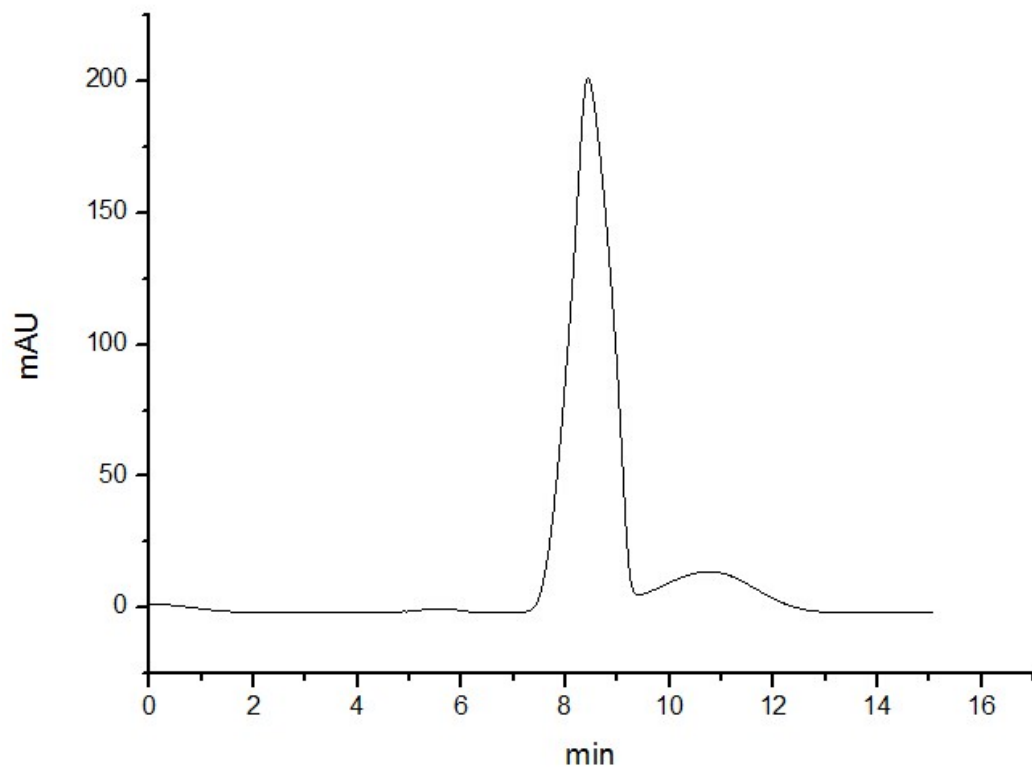

Figure 25. Reaction temperature: 70°C, Bio-reduction temperature: 90 °C, Au: Pd=2:1. Conversion: 11%, selectivity: 98%.

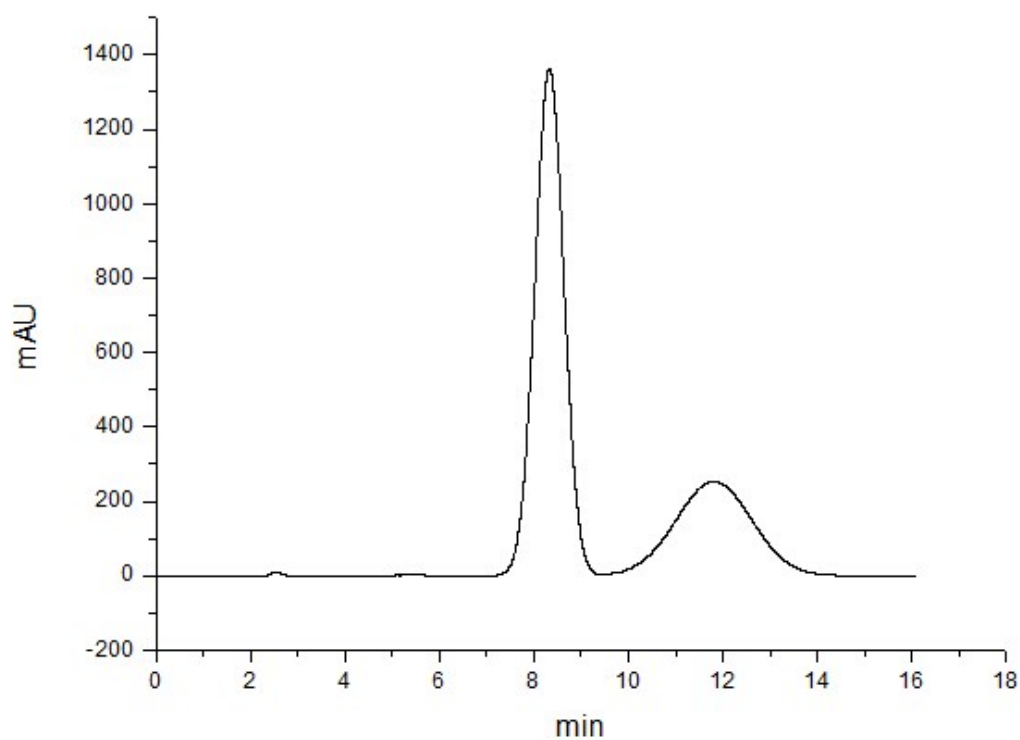

Figure 26. Reaction temperature: 80°C, Bio-reduction temperature: 90 °C, Au: Pd=2:1. Conversion: 34%, selectivity: 98%.

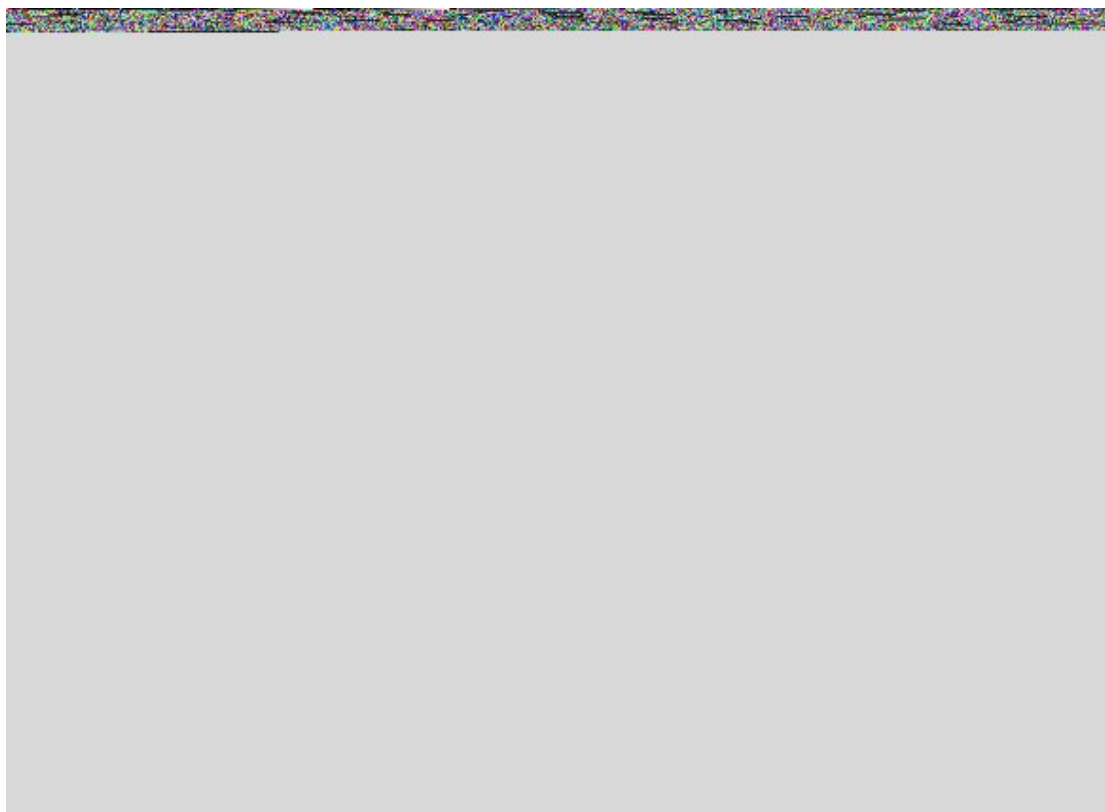

Figure 27. Reaction temperature: 90°C, Bio-reduction temperature: 90 °C, Au: Pd=2:1. Conversion: 76%, selectivity: 98%.

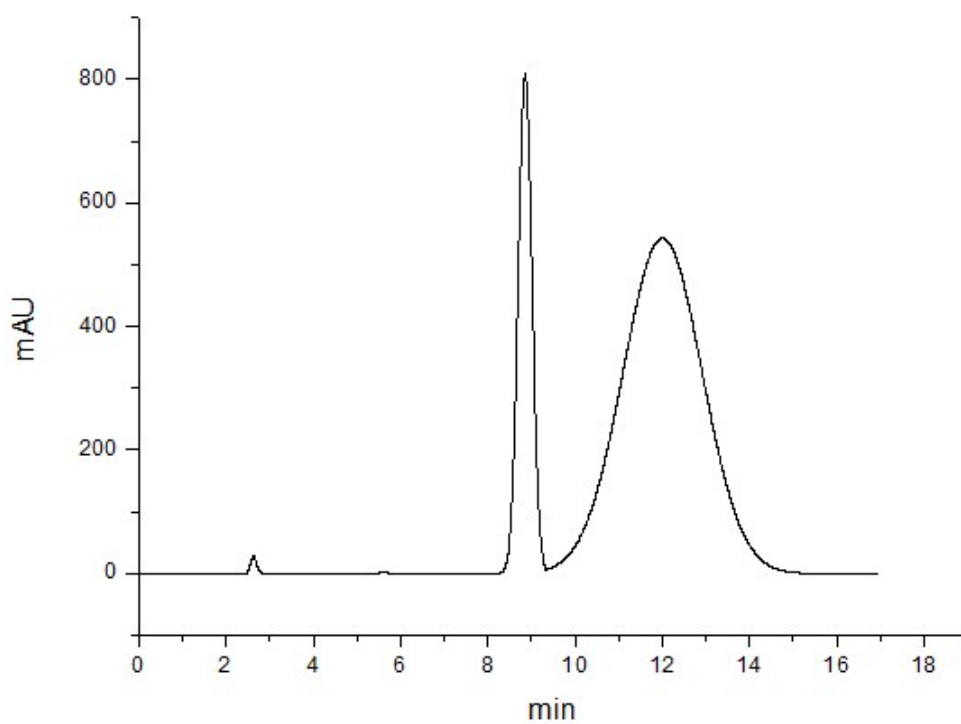

Figure 28. Reaction temperature: 100°C, Bio-reduction temperature: 90 °C, Au: Pd=2:1. Conversion: 76%, selectivity: 98%.
